# Supplementary material
Source: publisher site journal article supplement (https://www.dovepress.com/article/526181)
Supplement: Supplementary file 1 [file 526181%252509Supplementary%20Tables.docx]

**Supplementary Table 1**|Top differential metabolites in the ESI+ mode.

| **Name** | **Log2FC** | ***P*value** | **VIP** | **Up.Down** | ***Q*value** |
| --- | --- | --- | --- | --- | --- |
| **Methylbenzethonium chloride** | 8.177244 | 0.001555 | 1.100564 | up | 0.007233 |
| **Melatonin** | 8.145805 | 0.002491 | 1.042359 | up | 0.010447 |
| **Norbuprenorphine** | 7.837209 | 4.5E-07 | 1.726444 | up | 1.33E-05 |
| **PC 15:0_15:1** | 7.247449 | 0.000239 | 1.250569 | up | 0.001765 |
| **Tacrolimus** | 6.278319 | 8.44E-06 | 1.592776 | up | 0.00013 |
| **1,2-Dipalmitoylphosphatidylglycerol** | 6.237955 | 0.000121 | 1.251972 | up | 0.001032 |
| **SM 9:1;2O/30:8** | 6.198961 | 6.81E-08 | 1.83 | up | 3.33E-06 |
| **8Z,11Z,14Z-Eicosatrienoic acid** | 6.070852 | 0.00048 | 1.227141 | up | 0.002997 |
| **Emetine** | 5.950116 | 4.76E-06 | 1.557415 | up | 8.44E-05 |
| **PC O-38:9** | 5.63812 | 1.24E-06 | 1.702184 | up | 2.82E-05 |
| **SM 15:3;2O/18:5** | 5.573624 | 1.20E-05 | 1.518002 | up | 0.000168 |
| **Methyl dihydrojasmonate** | 5.022165 | 0.000411 | 1.404349 | up | 0.002649 |
| **PC O-42:10** | 5.016345 | 0.000334 | 1.168413 | up | 0.002268 |
| **PE O-16:2_17:2** | 4.850316 | 5.75E-06 | 1.584228 | up | 9.68E-05 |
| **Ergosta-5,7,9(11),22-Tetraen-3-beta-Ol** | 4.767961 | 7.49E-06 | 1.502376 | up | 0.000121 |
| **SM 9:1;2O/28:5** | 4.532067 | 5.04E-06 | 1.576679 | up | 8.59E-05 |
| **6beta-Naltrexol-d3** | 4.333047 | 9.08E-09 | 1.899941 | up | 5.69E-07 |
| **PE O-18:3_17:1** | 4.203438 | 0.000994 | 1.108149 | up | 0.005276 |
| **PC 18:2_20:5** | 4.10089 | 0.001033 | 1.097384 | up | 0.005411 |
| **pentane-1,2,3,4,5-pentol** | 4.083241 | 0.027042 | 1.048482 | up | 0.066584 |
| **Deoxynivalenol** | -2.24141 | 1.29E-09 | 2.022534 | down | 1.28E-07 |
| **Lysopg 18:1** | -2.25917 | 1.80E-09 | 2.086775 | down | 1.41E-07 |
| **LPC 16:1-SN1** | -2.36993 | 4.31E-10 | 2.242297 | down | 5.63E-08 |
| **Rifampicin** | -2.41341 | 1.15E-06 | 2.164787 | down | 2.64E-05 |
| **Bis(2-ethylhexyl) phosphate** | -2.41409 | 1.48E-10 | 2.015903 | down | 2.58E-08 |
| **1,7-bis(4-hydroxyphenyl)heptan-3-one** | -2.41419 | 7.44E-12 | 2.258515 | down | 3.89E-09 |
| **Tetranor-12(S)-HETE** | -2.43618 | 0.000377 | 1.91046 | down | 0.002492 |
| **Lysope 16:0** | -2.48867 | 2.96E-11 | 2.263115 | down | 9.27E-09 |
| **5-hydroxy-2-phenyl-4H-chromen-4-one** | -2.60896 | 3.10E-05 | 1.699098 | down | 0.000371 |
| **QPH** | -2.64984 | 2.70E-09 | 2.146035 | down | 1.92E-07 |
| **N1-(2,6-dimorpholino-3-pyridyl)-4-methylbenzamide** | -2.71115 | 3.29E-05 | 1.944786 | down | 0.000387 |
| **AL 8810 Methyl ester** | -2.71586 | 1.80E-11 | 2.182121 | down | 7.05E-09 |
| **N-[4-(benzyloxy)phenyl]-N'-(1,3-diphenyl-1H-pyrazol-5-yl)urea** | -2.94858 | 0.003019 | 1.615297 | down | 0.012124 |
| **1,7,8-trihydroxy-3-methyl-1,2,3,4,7,12-hexahydrotetraphen-12-one** | -3.01734 | 0.00052 | 1.895241 | down | 0.003149 |
| **1-(4-methoxyphenyl)-4-phenyl-2(1H)-pyrimidinethione** | -3.17262 | 4.91E-07 | 2.0022 | down | 1.40E-05 |
| **Fasciculic acid C** | -3.23775 | 5.07E-11 | 2.235193 | down | 1.32E-08 |
| **Sanguinarine** | -3.3527 | 5.64E-05 | 1.926154 | down | 0.000593 |
| **Tetrahydrocorticosterone** | -3.44296 | 7.59E-11 | 2.164466 | down | 1.66E-08 |
| **4-Methyl-2-Oxopentanoic Acid** | -3.52073 | 7.07E-10 | 2.170556 | down | 8.51E-08 |
| **Lysopc 16:1** | -4.12939 | 8.82E-13 | 2.40007 | down | 6.90E-10 |

**Supplementary Table 2**| Top differential metabolites in the ESI- mode.

| **Name** | **Log2FC** | ***P*value** | **VIP** | **Up.Down** | ***Q*value** |
| --- | --- | --- | --- | --- | --- |
| **N1-(1-phenylethyl)-4-(2-chloro-6-nitrophenoxy)benzene-1-sulfonamide** | 7.897673 | 7.52E-06 | 1.476569 | up | 0.000181 |
| **Prostaglandin F3α** | 7.472262 | 2.70E-05 | 1.48322 | up | 0.000418 |
| **5,7-dimethyl-2-(methylthio)pyrazolo[1,5-a]pyrimidine-3-carbonitrile** | 6.317538 | 3.79E-06 | 1.56008 | up | 0.000106 |
| **N1-(4-chlorophenyl)-2-cyano-4,4-dimethyl-3-oxopentanamide** | 5.674156 | 0.000155 | 1.239328 | up | 0.001476 |
| **Xanthurenic acid** | 5.138262 | 0.000727 | 1.232665 | up | 0.004397 |
| **albiflorin** | 5.118518 | 7.35E-05 | 1.299056 | up | 0.00086 |
| **PB-22 N-pentanoic acid-3-carboxyindole metabolite** | 5.023073 | 0.010214 | 1.015151 | up | 0.029849 |
| **Salvinorin B** | 5.011153 | 1.39E-05 | 1.42395 | up | 0.000262 |
| **MGDG O-12:0_20:4** | 4.516538 | 0.001735 | 1.044374 | up | 0.007735 |
| **2-Hydroxy-4-methylthiobutanoic acid** | 4.317557 | 0.001202 | 1.076132 | up | 0.006044 |
| **Prostaglandin D3** | 4.245485 | 8.98E-07 | 1.911272 | up | 3.38E-05 |
| **(3-Methoxy-4-hydroxyphenyl)ethylene glycol sulfate** | 3.987818 | 0.000719 | 1.183766 | up | 0.004377 |
| **LPC 20:2** | 3.932925 | 1.34E-06 | 2.005625 | up | 4.63E-05 |
| **N2-(2,3-dihydrobenzo[b]furan-5-ylmethyl)-2-thiophenesulfonamide** | 3.919413 | 0.000126 | 1.267464 | up | 0.00127 |
| **1-Palmitoyl-Sn-Glycero-3-Phosphocholine** | 3.908076 | 6.00E-05 | 1.45689 | up | 0.000765 |
| **DY131** | 3.865435 | 0.000366 | 1.228713 | up | 0.002775 |
| **3,4-dihydro-2H,6H-[1,3]thiazino[2,3-b]quinazolin-6-one** | 3.690117 | 0.000925 | 1.220543 | up | 0.005099 |
| **Argininosuccinic acid** | 3.634005 | 0.001228 | 1.217829 | up | 0.00612 |
| **LPE 20:1** | 3.516821 | 1.17E-05 | 1.831619 | up | 0.000253 |
| **Gibberellin A4** | 3.492446 | 0.000432 | 1.318868 | up | 0.003175 |
| **Capric acid** | -1.88511 | 5.85E-08 | 1.773647 | down | 3.69E-06 |
| **N1-[1-[(4-fluoroanilino)carbonyl]-2-(2-thienyl)vinyl]benzamide** | -1.92074 | 5.66E-05 | 1.451355 | down | 0.000742 |
| **HexCer 17:1;2O/5:0** | -1.98154 | 1.05E-12 | 2.368017 | down | 9.12E-10 |
| **4-Methylvaleric Acid** | -2.00949 | 1.82E-06 | 1.545028 | down | 5.63E-05 |
| **3-[(4-chlorophenyl)thio]-1-(3-pyridylmethyl)pyrrolidine-2,5-dione** | -2.0352 | 5.97E-08 | 1.787173 | down | 3.69E-06 |
| **L-beta-Imidazolelactic acid** | -2.15797 | 1.34E-05 | 1.581353 | down | 0.000262 |
| **dTMP** | -2.25674 | 0.000587 | 1.50282 | down | 0.003877 |
| **14,15-Leukotriene E4** | -2.26652 | 1.59E-11 | 2.475541 | down | 4.58E-09 |
| **Lactobionic acid** | -2.33735 | 5.79E-08 | 1.763129 | down | 3.69E-06 |
| **N-Oleoyl Glycine** | -2.42509 | 1.25E-08 | 1.979412 | down | 9.81E-07 |
| **4-benzyl-N-(3,5-dichlorophenyl)-1,4-diazepane-1-carboxamide** | -2.44584 | 0.038865 | 1.148627 | down | 0.0814 |
| **PG O-15:1_20:4** | -2.51495 | 0.015003 | 1.890046 | down | 0.039555 |
| **3-(2-thienyl)-1,2,4-oxadiazole-5-carbohydrazide** | -2.65376 | 3.62E-11 | 2.124787 | down | 7.83E-09 |
| **Gibberellin A7** | -2.70051 | 1.52E-11 | 2.237237 | down | 4.58E-09 |
| **Esculin** | -2.76961 | 8.65E-11 | 2.22314 | down | 1.25E-08 |
| **3-Coumaric acid** | -2.84148 | 5.35E-09 | 2.121303 | down | 5.14E-07 |
| **JWH 250 N-pentanoic acid metabolite** | -2.94403 | 4.02E-09 | 2.058487 | down | 4.35E-07 |
| **S-Lactoyglutathione** | -2.97019 | 0.002222 | 1.8181 | down | 0.009198 |
| **Rutarin** | -3.60274 | 1.34E-10 | 2.490144 | down | 1.65E-08 |
| **Cnidioside A** | -3.73195 | 5.27E-11 | 2.304629 | down | 9.11E-09 |
